# Supplementary material for: Investigating the mechanism of impact of the Quality Premium initiative on antibiotic prescribing in primary care practices in England: a study protocol
Source: PubMed Central journal article supplement (PMC6731864; doi:10.1136/bmjopen-2019-030093), 2019-09-03
Supplement: bmjopen-2019-030093.draft_revisions.pdf [file bmjopen-2019-030093.draft_revisions.pdf]

# BMJ Open

BMJ Open is committed to open peer review. As part of this commitment we make the peer review history of every article we publish publicly available.

When an article is published we post the peer reviewers' comments and the authors' responses online. We also post the versions of the paper that were used during peer review. These are the versions that the peer review comments apply to.

The versions of the paper that follow are the versions that were submitted during the peer review process. They are not the versions of record or the final published versions. They should not be cited or distributed as the published version of this manuscript.

BMJ Open is an open access journal and the full, final, typeset and author-corrected version of record of the manuscript is available on our site with no access controls, subscription charges or pay-per-view fees (<http://bmjopen.bmj.com>).

If you have any questions on BMJ Open's open peer review process please email [info.bmjopen@bmj.com](mailto:info.bmjopen@bmj.com)

# BMJ Open

## Investigating the Mechanism of Impact of the Quality Premium Initiative on Antibiotic Prescribing in Primary Care Practices in England: A Study Protocol.

|                               |                                                                                                                                                                                                                                                                                                                                                                                                                                             |
|-------------------------------|---------------------------------------------------------------------------------------------------------------------------------------------------------------------------------------------------------------------------------------------------------------------------------------------------------------------------------------------------------------------------------------------------------------------------------------------|
| Journal:                      | <i>BMJ Open</i>                                                                                                                                                                                                                                                                                                                                                                                                                             |
| Manuscript ID                 | bmjopen-2019-030093                                                                                                                                                                                                                                                                                                                                                                                                                         |
| Article Type:                 | Protocol                                                                                                                                                                                                                                                                                                                                                                                                                                    |
| Date Submitted by the Author: | 27-Feb-2019                                                                                                                                                                                                                                                                                                                                                                                                                                 |
| Complete List of Authors:     | Anyanwu, Philip; Imperial College London, Global Digital Health Unit, Department of Primary Care and Public Health<br>Tonkin-Crine, Sarah ; University of Oxford, Nuffield Department of Primary Care Health Sciences<br>Borek , Aleksandra ; Oxford University, Nuffield Department of Primary Care Health Sciences<br>Costelloe, Ceire; Imperial College London, Global Digital Health Unit, Department of Primary Care and Public Health |
| Keywords:                     | Antibiotics, Quality Premium Initiative, Resistance, PRIMARY CARE, Mediation analysis, General practice                                                                                                                                                                                                                                                                                                                                     |
|                               |                                                                                                                                                                                                                                                                                                                                                                                                                                             |

SCHOLARONE™  
Manuscripts

1  
2  
3  
4  
5  
6  
7  
8  
9  
10  
11  
12  
13  
14  
15  
16  
17  
18  
19  
20  
21  
22  
23  
24  
25  
26  
27  
28  
29  
30  
31  
32  
33  
34  
35  
36  
37  
38  
39  
40  
41  
42  
43  
44  
45  
46  
47  
48  
49  
50  
51  
52  
53  
54  
55  
56  
57  
58  
59  
60

**Title:** Investigating the Mechanism of Impact of the Quality Premium Initiative on Antibiotic Prescribing in Primary Care Practices in England: A Study Protocol.

**Authors:**

**Philip Emeka Anyanwu PhD**  
Global Digital Health Unit  
Department of Primary Care and Public Health  
Faculty of Medicine  
Imperial College London  
email: anyanwuphilipemeka@gmail.com

**Sarah Tokin-Crine PhD**  
Nuffield Department of Primary Care Health Sciences  
Medical Sciences Division  
Oxford University  
Oxford

**Aleksandra Borek PhD**  
Nuffield Department of Primary Care Health Sciences  
Medical Sciences Division  
Oxford University  
Oxford

**Ceire Costelloe PhD**  
Global Digital Health Unit  
Department of Primary Care and Public Health  
Faculty of Medicine  
Imperial College London

## 33 **Abstract**

## 34 **Introduction**

35 The persistent development and spread of resistance to antibiotics remains an important public  
36 health concern in the UK and globally. About 74% of the antibiotics prescribed in England in  
37 2016 was in primary care. The Quality Premium (QP) initiative that rewards Clinical  
38 Commissioning Groups financially based on the quality of specific health services  
39 commissioned is one of the NHS England interventions to reduce antimicrobial resistance  
40 through reduced prescribing. Emerging evidence suggests a reduction in antibiotic prescribing  
41 in primary care practices in the UK following QP initiative. This study aims to investigate the  
42 mechanism of impact of this high-cost health-system level intervention on antibiotic  
43 prescribing in primary care practices in England.

## 44 **Methods and analysis**

45 The study will constitute secondary analyses of antibiotic prescribing data for almost all  
46 primary care practices in England from the NHS England Antibiotic Quality Premium  
47 Monitoring Dashboard and OpenPrescribing covering the period 2013 to 2018. The primary  
48 outcome is the number of antibiotic items per Specific Therapeutic group Age-sex Related  
49 Prescribing Unit (STAR-PU) prescribed monthly in each practice or CCG. We will first  
50 conduct an interrupted time series using the Ordinary Least Square regression method to  
51 examine whether antibiotic prescribing rate in England has changed over time, and how such  
52 changes, if any, are associated with the QP implementation. Single and sequential multiple-  
53 mediator models using a unified approach for the natural direct and indirect effects will be  
54 conducted to investigate the relationship between the QP initiative, the potential mediators and  
55 antibiotic prescribing rate with adjustment for the practice and CCG characteristics.

## 56 **Ethics and dissemination**

57 This study will use secondary data that are anonymised and obtained from studies that have  
58 either undergone ethical review or generated data from routine collection systems. Multiple  
59 channels will be used in disseminating the findings from this study to academic and non-  
60 academic audiences.

61

62

1  
2  
3 **63 Strengths and Limitations of this study**  
4

- 5  
6 64 • This study will be the first to evaluate the mechanism of the impact of a financial  
7 65 incentive initiative involving Clinical Commissioning Groups to improve antibiotic  
8 66 prescribing in primary care practices in England.  
9  
10  
11 67 • The investigation of multiple mediators in this study will help to identify the  
12 68 contributions of multiple strategies in translating the effects of QP while unpacking the  
13 69 extent of the effect of specific mediators.  
14  
15  
16 70 • Due to the limited data on practice-level interventions or strategies that might  
17 71 potentially mediate the effect of the QP on antibiotic prescribing, we will not be able to  
18 72 extensively investigate the mechanism of QP impact at the practice level.  
19  
20  
21 73 • Nevertheless, extensive investigations will be conducted at CCG level where the  
22 74 Quality Premium initiative is implemented, and rewards paid out.  
23  
24  
25  
26  
27  
28  
29  
30  
31  
32  
33  
34  
35  
36  
37  
38  
39  
40  
41  
42  
43  
44  
45  
46  
47  
48  
49  
50  
51  
52  
53  
54  
55  
56  
57  
58  
59  
60

## 76 Introduction

77 The persistent development and spread of resistance to antimicrobials, especially antibiotics,  
78 remains an important public health concern in the UK<sup>1</sup> and globally.<sup>2,3</sup> Antimicrobial resistance  
79 (AMR) is a major threat to the treatment and control of infectious diseases as drug-resistant  
80 infections are characterised by prolonged morbidity, increased risk of disabilities, death, and  
81 cost of healthcare.<sup>4</sup> A 2014 review estimated that consistent increases in AMR would lead to  
82 about 10 million deaths per year by 2050.<sup>5</sup> Inappropriate prescribing and use of antibiotics in  
83 healthcare practices, especially primary care, are integral to the development and spread of  
84 resistance.<sup>6,7</sup>

85 About seventy-four per cent of the antibiotics prescribed in England in 2016 was in primary  
86 care.<sup>8</sup> The high rate of antibiotic prescribing in primary care has been associated with increased  
87 antimicrobial resistance.<sup>9</sup> While some of the antibiotics prescribed in primary care settings are  
88 appropriate, a substantial proportion are cases where antibiotics are not clinically indicated,  
89 such as suspected respiratory tract conditions which can be self-limiting.<sup>9,10</sup> Uncertainties about  
90 diagnosis, (perceived) patient expectations for antibiotics, occupational pressure (e.g.  
91 consultation rate) and previous experiences, are some of the identified drivers of  
92 overprescribing in primary care practices.<sup>11-16</sup>

93 Interventions such as antibiotic stewardship programmes, education and training initiatives  
94 targeted at prescribers and patients, financial incentives, among others have been implemented  
95 in England to reduce antimicrobial resistance through reduced prescribing. In particular, the  
96 Quality Premium (QP) is an NHS England initiative established in 2013 to reward Clinical  
97 Commissioning Groups (CCGs) financially based on the quality of specific health services  
98 considered to be of national or local priority and commissioned over a specific period.<sup>17</sup>  
99 Improvement of antibiotic prescribing in primary care was one of the national priorities in the  
100 2015/16 guidance,<sup>18</sup> constituting 10% of the premium awarded from 2016/17 to date.<sup>19,20</sup> Key  
101 aspects of the 'improved antibiotic prescribing' priority are reductions in the number of  
102 antibiotics prescribed in primary care facilities across England, and in the proportion of broad-  
103 spectrum antibiotics prescribed in primary care (2015-2017).<sup>19</sup> Part of the requirements in the  
104 2015/16 QP guidance for demonstrating improved antibiotic prescribing by CCGs was a  
105 reduction in the number of antibiotics prescribed in primary care by 1% of the mean value in  
106 England in 2013/14 (i.e. 1.61 items per Specific Therapeutic group Age-sex Related  
107 Prescribing Unit (STAR-PU)). This was further increased to 4% in the 2016/17 guidance.

1  
2  
3 108 Emerging evidence suggests a reduction in antibiotic prescribing in primary care practices in  
4  
5 109 the UK following the QP initiative.<sup>21,22</sup> Prescribing data from England shows a reduction of  
6  
7 110 about 2.7 million antibiotic items between 2014/15 and 2016/17 financial year.<sup>23</sup> Eighty-eight  
8  
9 111 per cent of the CCGs in England achieved the target of reducing antibiotic prescribing in the  
10  
11 112 first two years of QP.<sup>21</sup> Also, there has been a significant reduction in the proportion of broad-  
12  
13 113 spectrum antibiotics prescription with 83% of the CCGs meeting their target in the first two  
14  
15 114 years.<sup>21</sup> Such reductions in antibiotic prescribing would be expected to contribute to reductions  
16  
17 115 in the development of resistance.<sup>24</sup> However, little is known about the mechanisms by which  
18  
19 116 the QP initiative impacted on antibiotic prescribing in primary care practices.

20 117 The impact of interventions on specific outcomes are sometimes explained by a series of  
21  
22 118 events. Potential mediators are important in assessing causal relationships like that between QP  
23  
24 119 and antibiotic prescribing in primary care practices in England; where a *potential mediator* is  
25  
26 120 a variable that hypothetically mediates the effect of QP on the outcome. The conceptual model  
27  
28 121 shown in fig.1 demonstrates the hypothesised pathways for the impact of the QP initiative on  
29  
30 122 antibiotic prescribing, and subsequently AMR. The model is developed based on conceptual  
31  
32 123 and empirical evidence from existing literature and the results of qualitative and survey studies  
33  
34 124 conducted as initial stages of the broader STEP-UP (Improving the uptake and Sustainability  
35  
36 125 of Effective interventions to promote Prudent antibiotic Use in Primary care)<sup>25</sup> project that  
37  
38 126 includes the current study. The conceptual model will be further validated through a  
39  
40 127 stakeholder workshop with key antibiotic stewardship personnel, primary care prescribers, and  
41  
42 128 CCG representatives.

43 129 Our conceptual model suggests that in addition to its direct impact, the QP initiative acts by  
44  
45 130 stimulating and enhancing the adoption of existing strategies to reduce and optimise antibiotic  
46  
47 131 prescribing. In investigating the potential pathways connecting QP to reductions in antibiotic  
48  
49 132 prescribing, we will be examining the hypothesis that factors like the Chief Medical Officer's  
50  
51 133 (CMO) letter, TARGET toolkit, antibiotic auditing, benchmarking, local incentives at CCG  
52  
53 134 level, prescribers and patients' antimicrobial stewardship (AMS) education/training can  
54  
55 135 transmit part of the influence of the QP initiative to antibiotic prescribing.

56  
57 136 **[insert fig. 1]**

58  
59 137 First implemented in September 2014, the CMO letter, which provided social norm feedback  
60  
138 to primary care practitioners in England whose antibiotic prescribing rate was in the top 20%,

1  
2  
3 139 reduced antibiotic prescribing by 3.3% in six months in a randomised trial.<sup>26</sup> The criteria for  
4 140 selecting practices that received the letters in the subsequent years changed with the addition  
5 141 of measures like a change in antibiotic prescribing over time, and whether practices have  
6 142 previously been sent CMO letter.

7  
8 143 Another important mediator hypothesised in our conceptual model is AMS education/training  
9 144 of prescribers and patients. Educating and training prescribers on the importance of antibiotic  
10 145 stewardship and ways to promote prudence can help prescribers make better decisions on when  
11 146 an antibiotic is indicated and can also improve patients' knowledge on the appropriate use of  
12 147 antibiotics. AMS interventions targeted at patients can improve their knowledge of when  
13 148 antibiotics are not needed, increase confidence and skills on how to self-care, which can result  
14 149 in reduced consultations for self-limiting illness and thus reduced antibiotic prescriptions.

15  
16  
17 150 Treat Antibiotics Responsibly, Guidance, Education, Tools (TARGET) is a toolkit developed  
18 151 by the Public Health England, the Royal College of General Practitioners and other  
19 152 professional societies to promote prudent antibiotic use among prescribers and patients in  
20 153 primary care.<sup>27</sup> The intervention comprises of multiple resources (patient information leaflets  
21 154 on infection management and antibiotic use, self-assessment checklist for prescribers,  
22 155 antibiotic audit toolkits, interactive workshop presentations, national antibiotic management  
23 156 guidance, training resources, and resources for clinical and waiting areas) to provide clinicians  
24 157 and patients with the motivation and skills to use antibiotics prudently.<sup>27</sup> A qualitative study  
25 158 evaluating prescribers' attitude and perception about the TARGET toolkit reported that general  
26 159 practitioners described it as useful and important in improving their prescribing behaviours and  
27 160 the expectations of their patients.<sup>28</sup> The use of resources like the TARGET antibiotics  
28 161 workshop have been shown to reduce antibiotic prescribing rate in a randomised controlled  
29 162 trial.<sup>29</sup>

30  
31  
32 163 We hypothesise that the implementation of the QP initiative informed the initiation or wider  
33 164 use of these strategies indicated in the conceptual model as mediators, which will subsequently  
34 165 influence antibiotic prescribing at primary care practices.

35  
36  
37 166 The implementation of the QP initiative in NHS England constitutes a natural experiment and  
38 167 offers an opportunity to investigate the pre and post-intervention periods to understand the  
39 168 mechanism of impact of the QP intervention in reducing antibiotic prescribing rates across the  
40 169 whole of primary care.<sup>30</sup> Given the ethical and practical constraints in manipulating exposure  
41 170 in such an intervention, a natural experimental design offers a practical approach to understand



1  
2  
3 171 the overall effect and mechanism of interventions like QP that offer financial incentives for  
4  
5 172 clinical compliance. The publication of the 2015/16 QP Guidance<sup>18</sup> constitutes the  
6  
7 173 'intervention', with periods before this as the 'control'.  
8

## 9 174 **Study Aim and Objectives**

10  
11 175 Using routinely collected population-level datasets on antibiotic prescribing in England, this  
12  
13 176 study aims to address the research question: What are the mechanisms and mediators of the  
14  
15 177 impact of a high-cost health-system level intervention, the 'antibiotic prescribing quality  
16  
17 178 premium'? We will investigate the difference in antibiotic prescribing rate pre and post-QP  
18  
19 179 initiative to establish its direct, indirect (through mediators), and total effects in reducing  
20  
21 180 antibiotic prescribing in primary care practices in England.

## 22 181 **Methods and Analysis**

### 23 182 **Study Design**

24  
25  
26  
27 183 Contemporary evaluations of the effectiveness of health policies go beyond estimating their  
28  
29 184 total effect on outcomes. Mediation analysis decomposes the total effect of an intervention into  
30  
31 185 separate causal pathways,<sup>31</sup> enabling an understanding of why and how policies work by  
32  
33 186 estimating the direct and indirect effects of the exposure.<sup>32</sup> We will conduct mediation analyses  
34  
35 187 investigating the potential mediators of the impact of QP on antibiotic prescribing in primary  
36  
37 188 care in England, establishing the direct and indirect effects of the QP initiative.

### 38 189 **Data sources**

39  
40  
41 190 The study will constitute secondary analyses of antibiotic prescribing data from NHS England  
42  
43 191 covering the period 2013 to 2018. CCGs were established in England in April 2013 following  
44  
45 192 the Health and Social Care Act 2012.<sup>33</sup> Data on antibiotic prescribing in primary care at CCG  
46  
47 193 levels will be sourced from the NHS England Antibiotic Quality Premium Monitoring  
48  
49 194 Dashboard, which is produced by the NHS Business Services Authority (BSA).<sup>34</sup> Primary Care  
50  
51 195 prescribing data is publicly available from the NHS BSA website. The dataset contains the  
52  
53 196 number of antibiotic items (STAR-PU) prescribed in each CCG from the financial year 2015/16  
54  
55 197 to 2018/19, with data for October 2018 the latest at the time of this protocol. Data for the period  
56  
57 198 2013 to 2015 will be mapped to CCG-level from the practice-level data.

58  
59 199 Practice-level antibiotic prescribing data will be sourced from OpenPrescribing, an Evidence-  
60  
200 Based Medicine DataLab project by the University of Oxford. OpenPrescribing publishes

1  
2  
3 201 monthly antibiotics prescribing data from August 2013, with data for October 2018 the latest  
4  
5 202 at the time of this protocol. Practice-level antibiotic prescribing data from OpenPrescribing is  
6  
7 203 not STAR-PU weighted, so the extracted data will be STAR-PU weighted using figures from  
8  
9 204 the 2013 Item-based age–sex weighting for oral antibacterials,<sup>14</sup> and the number of registered  
10  
11 205 patients in each age-gender category in a practice for each specific month.

12  
13 206 Overall, the dataset offers coverage of at least three years post-intervention given that antibiotic  
14  
15 207 prescribing became a QP priority in March 2015. This will be important in investigating the  
16  
17 208 immediate direct and indirect effects of the QP initiative while giving an insight into the  
18  
19 209 sustainability of the identified effects (if any) in the long-term.

## 20 210 **Variables**

21  
22 211 The predictor will be a binary variable indicating the implementation of the QP intervention.  
23  
24 212 The intervention will include all periods after March 2015 when the 2015/16 QP guidance in  
25  
26 213 England was published, while the control will be periods prior to this. The primary outcome of  
27  
28 214 interest is the rates of antibiotic prescribing at CCG level in England, which will be a  
29  
30 215 continuous variable indicating the number of items (per STAR-PU) prescribed per month.

31  
32 216 To account for differences in practice and CCG characteristics that can contribute to variance  
33  
34 217 in antibiotic prescribing, we will be adjusting for the number of General Practitioners in each  
35  
36 218 practice (from the NHS Workforce data),<sup>35</sup> the index of multiple deprivation (from the  
37  
38 219 Department for Communities and Local Government),<sup>36</sup> prevalence of co-morbidities -asthma,  
39  
40 220 chronic obstructive pulmonary disease (COPD), diabetes, cancer, chronic kidney disease (from  
41  
42 221 the NHS Quality and Outcomes Framework database),<sup>37</sup> and seasonal flu vaccination rate (from  
43  
44 222 Public Health England).<sup>38</sup>

45 223 Mediator variables will be derived from the questionnaire data from a PHE survey<sup>39</sup> with 187  
46  
47 224 of the 209 AMS leads representing CCGs in England and data from other organizations that  
48  
49 225 have evaluated the interventions treated as potential mediators in this study. In the PHE survey,  
50  
51 226 participants were required to complete questionnaire items which included their adoption of  
52  
53 227 national and local strategies in their respective CCG to enable them to meet QP targets on  
54  
55 228 antibiotic prescribing in primary care. The mediator variables will be binary or continuous  
56  
57 229 variables indicating the adoption of key interventions and intermediaries that are hypothesised  
58  
59 230 to reflect in the integration of the QP guidance in improving antibiotic prescribing in primary  
60  
231 care practices.

## 232 **Handling missing data**

233 Over the period covered by this study (2013-2018), there have been changes in the number of  
234 practices and CCGs in England. Some practices have closed, new practices opened, and some  
235 CCGs merged over the period; as such we have missing values for some observations. To  
236 maximize the use of existing observations, we will retain all observed values in the main  
237 analysis and impute the missing values using multiple approaches.<sup>40</sup> Missing values for the  
238 period before a new CCG was formed through merger of pre-existing CCGs will be imputed  
239 using the mean value of the CCGs that constitutes the merger; subsequently, these closed CCGs  
240 will be dropped from the dataset. Other missing values in this study will be handled using  
241 multiple imputation method on Mplus V.8.2. We will run a separate imputation model for the  
242 practice and CCG level datasets, the results will be averaged across 20 imputed datasets.  
243 Complete case analysis will be conducted as part of the sensitivity analyses for this study to  
244 examine the consistency of the results from the imputed set.

## 245 **Statistical analysis**

246 Our first analysis will be an interrupted time series to investigate whether antibiotic prescribing  
247 rate in England has changed over time, and how such changes, if any, are associated with the  
248 QP implementation in March 2015. This will be conducted using the Ordinary Least Square  
249 regression method<sup>41</sup> to assess whether the 2015/16 QP establishment resulted in a shift in the  
250 level and trend in antibiotic prescribing in primary care in England, compared to the period  
251 before the intervention. Using the practice-level dataset, a univariate time series with the mean  
252 antibiotic items (STAR-PU weighted) prescribed in all primary care practices in England for  
253 each month will be conducted using the *ITSA* function on Stata, with *posttrend* specification to  
254 show a post-intervention trend. The Cumby-Huizinga general test for autocorrelation will be  
255 used for general specification test of serial correlation in the time series data.<sup>42</sup>

256 A new Quality Premium guideline was implemented each financial year with changes in the  
257 prescribing rate target and the proportion that improved prescribing constituted in the QP award  
258 for each year. Our mediation analyses will investigate the effects of the QP by comparing  
259 antibiotic prescribing rate in the financial year before its implementation to each subsequent  
260 year post-implementation; as such our dataset for the mediation analyses will have the control  
261 group as the financial year before QP and the intervention group as a specific post-QP  
262 implementation year. Three analyses will be conducted for each of the three financial years  
263 since QP establishment. This will enable us to compare the effects of the different target levels

1  
2  
3 264 that have been set over the years, and the proportions of the QP award attributed to  
4  
5 265 improvement in antibiotic prescribing.  
6

7 266 Using a unified model for the natural direct and indirect effects,<sup>31</sup> we will investigate the  
8  
9 267 relationship between the QP initiative, the potential mediators and antibiotic prescribing rate  
10  
11 268 with adjustment for the practice and CCG characteristics. This approach addresses the issues  
12  
13 269 associated with the traditional approach to mediation analysis that obtains natural direct and  
14  
15 270 indirect effect estimates through a nontrivial combination of parameter estimates from multiple  
16  
17 271 models for the regression of the mediator and that of the outcome.<sup>43,44</sup> Also, the unified model  
18  
19 272 is applicable to nonlinear regressions, different measurement types for outcome and mediator  
20  
21 273 variables, and allows for interaction between the exposure and the mediator.<sup>31</sup>

22 274 We will first fit single-mediator models with each mediator separately modelled using the  
23  
24 275 *medeff* function in Stata.<sup>45</sup> With the single-mediator models, we will be able to establish the  
25  
26 276 individual influence of each potential mediator variable. Based on their effect size and  
27  
28 277 significance of the mediating pathway in the single-mediator models, the mediators will be  
29  
30 278 individually added to build a multiple-mediator model using a sequential mediation analysis  
31  
32 279 method.<sup>46</sup>

33 280 A sequential multiple mediators analysis is preferred to merely summing the effects of the  
34  
35 281 single mediators because this sum may differ from the joint mediated effect; particularly as our  
36  
37 282 potential mediators may influence one another.<sup>46</sup> Modelling all the significant mediators  
38  
39 283 together provides a more accurate assessment of the mediation effects and causal  
40  
41 284 relationship<sup>47,48</sup> while assessing the indirect effect of a group of mediators in explaining how  
42  
43 285 and why the intervention impacts on the outcome. The decision on the causal ordering of the  
44  
45 286 mediators in the sequential mediation analysis will consider the effect size from the single-  
46  
47 287 mediator models and evidence from the literature. All analysis will be conducted in the STATA  
48  
49 288 statistical package version 15.1.

### 289 **Sensitivity analyses**

50  
51 290 Sensitivity analyses using dummy implementation dates of one to three months before and after  
52  
53 291 the actual month each of the QP guidance were published will be conducted to assess the  
54  
55 292 difference between the time the guidance is published and the dissemination of information  
56  
57 293 and development of local arrangements by the CCGs. These analyses will further help to  
58  
59 294 investigate the anticipatory effect of the policy and whether lag in implementation attenuates  
60  
295 the effect of the intervention.

1  
2  
3 296 Also, we will conduct separate analysis with the outcome variable (antibiotic prescribing rate)  
4  
5 297 as a binary variable (indicating whether each CCG achieved the required rate of reduction in  
6  
7 298 antibiotic prescribing as stated in the QP guidance for each year) to examine whether the  
8  
9 299 classification of the outcome variable based on achievement of QP target influences the results.

10  
11 300 Subgroup analyses will be conducted on clusters of primary care practices based on their  
12  
13 301 antibiotic prescribing behaviour (high and low prescribers) and indices of deprivation to  
14  
15 302 examine whether any effect of the QP initiative seen in the overall population is different in  
16  
17 303 subgroups of practices. The top and bottom 20% antibiotic prescribers as of March 2015 will  
18  
19 304 be categorised as high and low prescribers. To address the issue of regression to mean in  
20  
21 305 subgroup analyses, we will build a separate model with categorization into high and low  
22  
23 306 prescribers based on the mean of the prescribing rate of practices in the last three months to  
24  
25 307 March 2015. The use of mean of multiple measures will offer a better estimate of each  
26  
27 308 practice's true mean before the 2015/16 Quality Premium initiative.<sup>49</sup> The subgroup analysis  
28  
29 309 based on the indices of deprivation data<sup>36,50</sup> at primary-care practice level will be important in  
30  
31 310 establishing the equity impact of the QP initiative.

### 311 **Limitations**

312 This study has some limitations. The survey that provided data on mediator variables included  
313  
314 187 of the 209 CCGs existing as at the time of the study. However, this sample size is large  
315  
316 enough for strong statistical power, and multiple imputation will be used to address issues on  
317  
318 missingness. Furthermore, due to the limited data on practice-level interventions or strategies  
319  
320 that might potentially mediate the effect of the QP on antibiotic prescribing, we will not be able  
321  
322 to extensively investigate the mechanism of QP impact at the practice level. Nevertheless,  
323  
324 extensive investigations will be conducted at CCG-level where we have more data on potential  
325  
326 mediators.

327  
328 In 2013, the Primary Care Trusts (PCTs) in England, which were responsible for planning and  
329  
330 commissioning health care services at the primary care level, were transformed to Clinical  
331  
332 Commissioning Groups.<sup>51</sup> As such, our investigations are restricted to the CCG era. This is  
333  
334 important as the Quality Premium initiative is implemented, and rewards paid out at CCG level.

### 335 **Discussion**

336 Although the Quality Premium intervention has been reported to have been effective in  
337  
338 reducing antibiotic prescribing,<sup>22</sup> there remain important gaps in the evidence base for this  
339  
340

1  
2  
3 327 intervention, especially in relation to its mechanism of impact. This study will be the first to  
4  
5 328 evaluate the mechanism of the impact of a financial incentive initiative involving CCGs to  
6  
7 329 improve antibiotic prescribing in primary care practices in England. If our study identifies some  
8  
9 330 key mediators, like other interventions implemented in similar time or in response to the QP  
10  
11 331 initiative, that explain the indirect effect of the QP intervention on antibiotic prescribing, this  
12  
13 332 will provide important evidence on the effectiveness of the implementation of a package of  
14  
15 333 interventions on antibiotic prescribing. The investigation of multiple mediators in this study  
16  
17 334 will also help to highlight the contributions of multiple factors in translating the effects of QP  
18  
19 335 while unpacking the extent of the effect of specific mediators.

20  
21 336 Evidence on the mechanism of impact of strategies like QP will be important in improving its  
22  
23 337 uptake and sustainability while maximizing its potential in reducing antibiotic prescribing in  
24  
25 338 primary care settings.

26  
27 339 Finally, financially-incentivized strategies for clinical compliance have been criticised for their  
28  
29 340 ability to result in unintended consequences.<sup>52</sup> In the case of the QP initiative, unintended  
30  
31 341 consequences like not prescribing antibiotics in cases where they are indicated are possible.  
32  
33 342 However, some of the QP response strategies that we hypothesised as potential mediators (such  
34  
35 343 as prescribers' AMS education/training) have the ability to mitigate this unintended  
36  
37 344 consequence. By comparing the prescribing rate before and after the QP initiative and  
38  
39 345 identifying the strategies that explain its effect, we will generate evidence that will be important  
40  
41 346 in considerations of the future of this intervention and revisions that may help reduce potential  
42  
43 347 unintended consequences.

#### 44 348 **Patient and public involvement**

45  
46 349 This study will use secondary data mostly from routine collection system and will not directly  
47  
48 350 involve patients. The engagement workshop with stakeholders will involve primary care  
49  
50 351 practitioners and CCG representatives.

#### 51 352 **Ethics and dissemination**

52  
53 353 This study will use secondary data that are anonymised and obtained from studies that have  
54  
55 354 either undergone ethical review or generated data from routine collection systems. Prescribing  
56  
57 355 data from NHS BSA and NHS Digital are generated from routinely collected prescribing data  
58  
59 356 on items that have been dispensed in primary care practices in England. The survey that  
60  
357 produced the data on mediator variables was registered with the Public Health England



1  
2  
3 358 Research Support and Governance Office (RSGO) and approved by Public Health England  
4  
5 359 Research Ethics and Governance Group (REGG) and Health Research Association (HRA).  
6

7 360 Multiple channels will be used in disseminating the findings from this study to academic and  
8  
9 361 non-academic audiences. With will include an engagement workshop with our stakeholder  
10  
11 362 network, presentations in scientific conferences, publication in peer-reviewed journals, press  
12  
13 363 conference coinciding with paper publications.  
14

#### 15 364 **Patient and public involvement**

16  
17 365 This study will not involve patients. The study will constitute secondary analyses of routinely  
18  
19 366 collected data. The dissemination of the results will include communication channels and  
20  
21 367 public engagement events that will involve prescribers and AMS leads.  
22

23 368

#### 24 369 **References**

- 25  
26 370 1. Department of Health. *UK five year antimicrobial resistance strategy 2013 to 2018*.  
27  
28 371 (Department of Health London, 2013).  
29  
30 372 2. United Nations. Draft political declaration of the high-level meeting of the General  
31  
32 373 Assembly on antimicrobial resistance. (2016).  
33  
34 374 3. *Antimicrobial resistance: global report on surveillance*. (World Health Organization,  
35  
36 375 2014).  
37  
38 376 4. World Health Organization. Antimicrobial resistance fact sheet. *WHO Geneva* (2018).  
39  
40 377 5. O'Neill, J. Antimicrobial resistance: tackling a crisis for the health and wealth of nations.  
41  
42 378 *Rev. Antimicrob. Resist* **20**, 1–16 (2014).  
43  
44 379 6. Bell, B. G., Schellevis, F., Stobberingh, E., Goossens, H. & Pringle, M. A systematic  
45  
46 380 review and meta-analysis of the effects of antibiotic consumption on antibiotic resistance.  
47  
48 381 *BMC infectious diseases* **14**, 13 (2014).  
49  
50 382 7. Ashraf, M. S. & Cook, P. P. Antibiotic misuse in hospital, outpatient, and long-term care  
51  
52 383 settings. *North Carolina medical journal* **77**, 346–349 (2016).  
53  
54  
55  
56  
57  
58  
59  
60

- 1  
2  
3 384 8. Public Health England. English Surveillance Programme for Antimicrobial Utilisation and  
4  
5 385 Resistance (ESPAUR). (2014).  
6  
7  
8 386 9. Costelloe, C., Metcalfe, C., Lovering, A., Mant, D. & Hay, A. D. Effect of antibiotic  
9  
10 387 prescribing in primary care on antimicrobial resistance in individual patients: systematic  
11  
12 388 review and meta-analysis. *BMJ* **340**, c2096 (2010).  
13  
14  
15 389 10. Dekker, A. R., Verheij, T. J. & van der Velden, A. W. Inappropriate antibiotic prescription  
16  
17 390 for respiratory tract indications: most prominent in adult patients. *Family practice* **32**, 401–  
18  
19 391 407 (2015).  
20  
21  
22 392 11. Cotter, M. & Daly, L. Antibiotic prescription practices of general practitioners. *Irish*  
23  
24 393 *medical journal* **100**, 598–600 (2007).  
25  
26 394 12. Coenen, S., Michiels, B., Renard, D., Denekens, J. & Royen, P. V. Antibiotic prescribing  
27  
28 395 for acute cough: the effect of perceived patient demand. *Br J Gen Pract* **56**, 183–190  
29  
30 396 (2006).  
31  
32  
33 397 13. Macfarlane, J., Holmes, W., Macfarlane, R. & Britten, N. Influence of patients’  
34  
35 398 expectations on antibiotic management of acute lower respiratory tract illness in general  
36  
37 399 practice: questionnaire study. *BMJ* **315**, 1211–1214 (1997).  
40  
41 400 14. Pouwels, K. B., Dolk, F. C. K., Smith, D. R. M., Smieszek, T. & Robotham, J. V.  
42  
43 401 Explaining variation in antibiotic prescribing between general practices in the UK. *J*  
44  
45 402 *Antimicrob Chemother* **73**, ii27–ii35 (2018).  
46  
47 403 15. Tonkin-Crine, S., Yardley, L. & Little, P. Antibiotic prescribing for acute respiratory tract  
48  
49 404 infections in primary care: a systematic review and meta-ethnography. *J Antimicrob*  
50  
51 405 *Chemother* **66**, 2215–2223 (2011).  
52  
53  
54 406 16. Germen, E. *et al.* Antibiotic prescribing for acute respiratory tract infections in primary  
55  
56 407 care: an updated and expanded meta-ethnography. *Br J Gen Pract* **68**, e633–e645 (2018).  
57  
58  
59 408 17. NHS England. Quality Premium: 2014/15 guidance for CCGs. (2014).  
60



- 1  
2  
3 409 18. NHS England. *Quality Premium: 2015/16 guidance for CCGs. 2015.* (2015).  
4  
5 410 19. NHS England. *Quality Premium Guidance for 2016/17.* (2016).  
6  
7 411 20. NHS England. *Technical guidance for refreshing NHS Plans 2018/19 Annex B:*  
8  
9 *Information on Quality Premium.* (2017).  
10 412  
11  
12 413 21. Public Health England. English Surveillance Programme for Antimicrobial Utilisation and  
13  
14 414 Resistance (ESPAUR): Report 2017. (2017).  
15  
16 415 22. Bou-Antoun, S. *et al.* Age-related decline in antibiotic prescribing for uncomplicated  
17  
18 416 respiratory tract infections in primary care in England following the introduction of a  
19  
20 417 national financial incentive (the Quality Premium) for health commissioners to reduce use  
21  
22 418 of antibiotics in the community: an interrupted time series analysis. *Journal of*  
23  
24 419 *Antimicrobial Chemotherapy* **73**, 2883–2892 (2018).  
25  
26 420 23. Public Health England. English surveillance programme for antimicrobial utilisation and  
27  
28 421 resistance (ESPAUR) Report 2018. (2018).  
29  
30 422 24. Butler, C. C. *et al.* Containing antibiotic resistance: decreased antibiotic-resistant coliform  
31  
32 423 urinary tract infections with reduction in antibiotic prescribing by general practices. *Br J*  
33  
34 424 *Gen Pract* **57**, 785–792 (2007).  
35  
36 425 25. UK Research and Innovation. Improving the uptake and Sustainability of Effective  
37  
38 426 interventions to promote Prudent antibiotic Use in Primary care (STEP-UP). *UK Research*  
39  
40 427 *and Innovation* (2017).  
41  
42 428 26. Hallsworth, M. *et al.* Provision of social norm feedback to high prescribers of antibiotics  
43  
44 429 in general practice: a pragmatic national randomised controlled trial. *The Lancet* **387**,  
45  
46 430 1743–1752 (2016).  
47  
48 431 27. Royal College of General Practitioners. *Target antibiotics toolkit.* (London, 2012).  
49  
50  
51  
52  
53  
54  
55  
56  
57  
58  
59  
60

- 1  
2  
3 432 28. Jones, L. F. *et al.* An evaluation of the TARGET (Treat Antibiotics Responsibly; Guidance,  
4 Education, Tools) Antibiotics Toolkit to improve antimicrobial stewardship in primary  
5 433  
6 Education, Tools) Antibiotics Toolkit to improve antimicrobial stewardship in primary  
7 care—is it fit for purpose? *Fam Pract* **35**, 461–467 (2018).  
8 434  
9
- 10 435 29. McNulty, C. *et al.* Effects of primary care antimicrobial stewardship outreach on antibiotic  
11 use by general practice staff: pragmatic randomized controlled trial of the TARGET  
12 436  
13 use by general practice staff: pragmatic randomized controlled trial of the TARGET  
14 antibiotics workshop. *J Antimicrob Chemother* **73**, 1423–1432 (2018).  
15 437  
16
- 17 438 30. Craig, P. *et al.* Using natural experiments to evaluate population health interventions: new  
18 MRC guidance. *J Epidemiol Community Health* **66**, 1182–1186 (2012).  
19 439  
20
- 21 440 31. Lange, T., Vansteelandt, S. & Bekaert, M. A Simple Unified Approach for Estimating  
22 Natural Direct and Indirect Effects. *Am J Epidemiol* **176**, 190–195 (2012).  
23 441  
24
- 25 442 32. Petersen, M. L., Sinisi, S. E. & van der Laan, M. J. Estimation of direct causal effects.  
26 *Epidemiology* 276–284 (2006).  
27 443  
28
- 29 444 33. Great Britain Department of Health. *Health and Social Care Act 2012*. (The Stationery  
30 Office, 2012).  
31 445  
32
- 33 446 34. NHS Business Services Authority. Information Services Portal. Detailed Prescribing  
34 Information. (2018).  
35 447  
36
- 37 448 35. NHS Digital. Workforce Data. *NHS Digital* (2018). Available at:  
38 <https://digital.nhs.uk/data-and-information/areas-of-interest/workforce>. (Accessed: 19th  
39 February 2019)  
40 449  
41
- 42 450  
43  
44  
45  
46
- 47 451 36. Department for Communities and Local Government. The English Indices of Deprivation  
48 2015 – Frequently Asked Questions (FAQs). (2016).  
49 452  
50
- 51 453 37. NHS Quality and Outcome Frameworks. Quality and Outcomes Framework, Achievement,  
52 prevalence and exceptions data - 2017-18 [PAS]. (2018).  
53 454  
54
- 55 455 38. Public Health England. Seasonal flu vaccine uptake in GP patients: monthly data, 2018 to  
56 2019. (2019).  
57 456  
58  
59  
60

- 1  
2  
3 457 39. Allison, R. *et al.* Local implementation of AMS initiatives: a mixed-methods study. *Br J*  
4  
5 458 *Gen Pract* **68**, bjgp18X697025 (2018).  
6  
7  
8 459 40. Sterne, J. A. *et al.* Multiple imputation for missing data in epidemiological and clinical  
9  
10 460 research: potential and pitfalls. *Bmj* **338**, b2393 (2009).  
11  
12 461 41. Linden, A. Conducting interrupted time-series analysis for single-and multiple-group  
13  
14 462 comparisons. *Stata J* **15**, 480–500 (2015).  
15  
16  
17 463 42. Baum, C. F. & Schaffer, M. E. A general approach to testing for autocorrelation. *Retrieved*  
18  
19 464 *May 7, 2015* (2013).  
20  
21  
22 465 43. Petersen, M. L., Sinisi, S. E. & van der Laan, M. J. Estimation of Direct Causal Effects.  
23  
24 466 *Epidemiology* **17**, 276–284 (2006).  
25  
26 467 44. VanderWeele, T. J. & Vansteelandt, S. Conceptual issues concerning mediation,  
27  
28 468 interventions and composition. *Statistics and its Interface* **2**, 457–468 (2009).  
29  
30  
31 469 45. Hicks, R. & Tingley, D. MEDIATION: Stata module for causal mediation analysis and  
32  
33 470 sensitivity analysis. (2012).  
34  
35  
36 471 46. VanderWeele, T. J. & Vansteelandt, S. Mediation Analysis with Multiple Mediators.  
37  
38 472 *Epidemiol Method* **2**, 95–115 (2014).  
39  
40 473 47. MacKinnon, D. P., Krull, J. L. & Lockwood, C. M. Equivalence of the mediation,  
41  
42 474 confounding and suppression effect. *Prevention science* **1**, 173–181 (2000).  
43  
44  
45 475 48. MacKinnon, D. P., Fairchild, A. J. & Fritz, M. S. Mediation analysis. *Annu. Rev. Psychol.*  
46  
47 476 **58**, 593–614 (2007).  
48  
49 477 49. Barnett, A. G., van der Pols, J. C. & Dobson, A. J. Regression to the mean: what it is and  
50  
51 478 how to deal with it. *Int J Epidemiol* **34**, 215–220 (2005).  
52  
53  
54 479 50. Smith, T. *et al.* The English indices of deprivation 2015. *London: Department for*  
55  
56 480 *Communities and Local Government* (2015).  
57  
58  
59  
60

- 1  
2  
3 481 51. Department of Health. Health and Social Care Act 2012. (2012). Available at:  
4  
5 482 [http://www.legislation.gov.uk/ukpga/2012/7/pdfs/ukpga\\_20120007\\_en.pdf](http://www.legislation.gov.uk/ukpga/2012/7/pdfs/ukpga_20120007_en.pdf). (Accessed:  
6  
7 483 9th October 2018)  
8  
9  
10 484 52. Campbell, S. M., Reeves, D., Kontopantelis, E., Sibbald, B. & Roland, M. Effects of pay  
11  
12 485 for performance on the quality of primary care in England. *New England Journal of*  
13  
14 486 *Medicine* **361**, 368–378 (2009).  
15  
16  
17 487

## 488 **Funding**

489 This study is funded by the Economics and Social Research Council (ES/P008232/1).  
490

## 491 **Authors contributions**

492 All authors contributed to the conception and study design. PA and CC developed the analysis  
493 plan. The manuscript was drafted by PA with further input from CC, STC and AB. All authors  
494 approved the submission of the manuscript.

## 495 **Competing Interests**

496 None declared.  
497

498

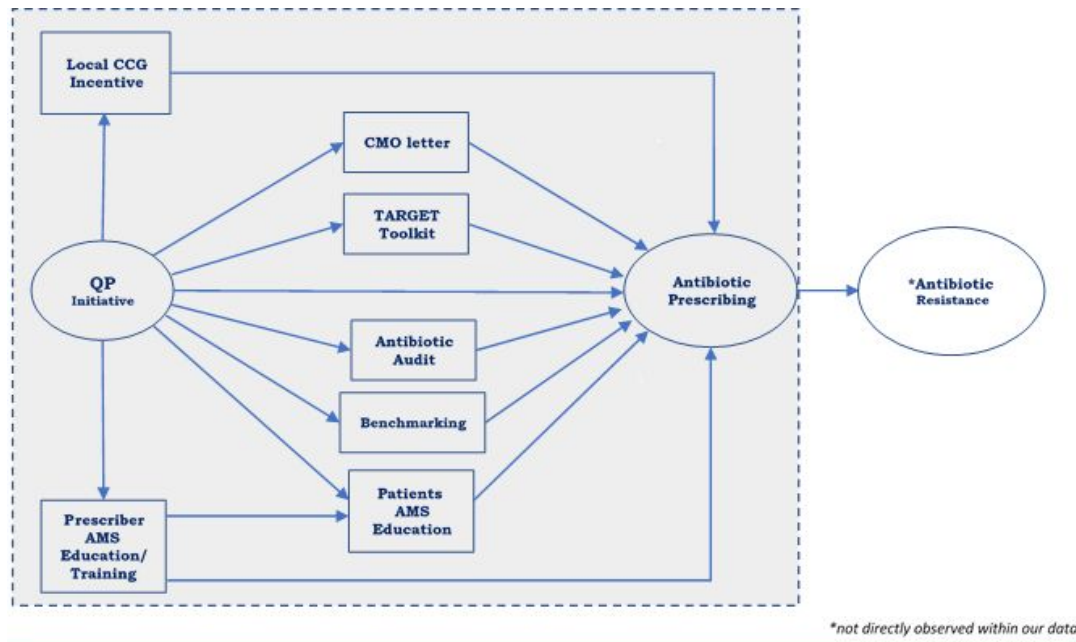

499 **Fig. 1: Conceptual model.** The direct effect is represented by path between the QP initiative  
 500 (predictor) and antibiotic prescribing rate (outcome).

501

502

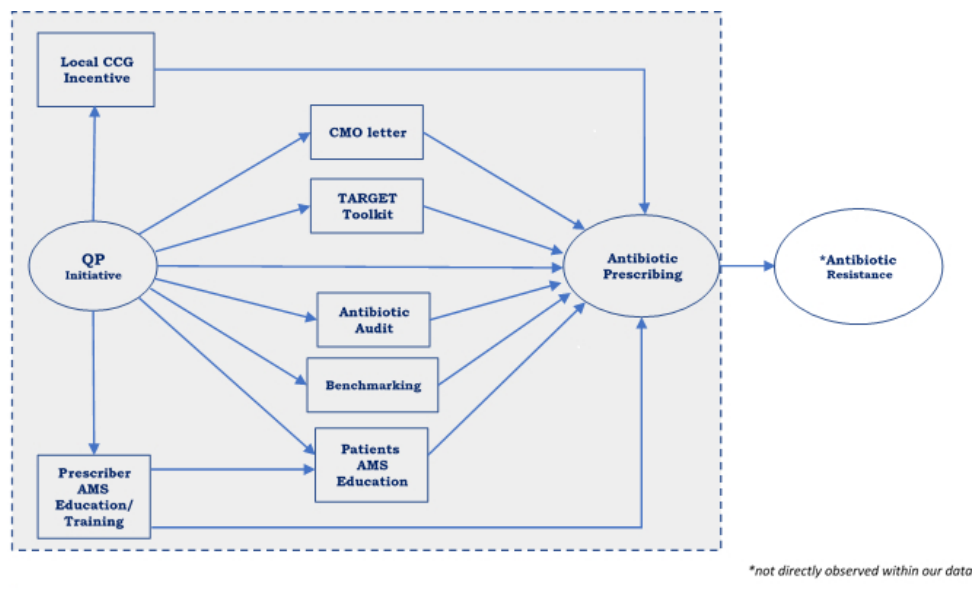

Fig. 1: Conceptual model. The direct effect is represented by the path between the QP initiative (predictor) and antibiotic prescribing rate (outcome).

# BMJ Open

## Investigating the Mechanism of Impact of the Quality Premium Initiative on Antibiotic Prescribing in Primary Care Practices in England: A Study Protocol.

|                                 |                                                                                                                                                                                                                                                                                                                                                                                                                                                                                                                                                               |
|---------------------------------|---------------------------------------------------------------------------------------------------------------------------------------------------------------------------------------------------------------------------------------------------------------------------------------------------------------------------------------------------------------------------------------------------------------------------------------------------------------------------------------------------------------------------------------------------------------|
| Journal:                        | <i>BMJ Open</i>                                                                                                                                                                                                                                                                                                                                                                                                                                                                                                                                               |
| Manuscript ID                   | bmjopen-2019-030093.R1                                                                                                                                                                                                                                                                                                                                                                                                                                                                                                                                        |
| Article Type:                   | Protocol                                                                                                                                                                                                                                                                                                                                                                                                                                                                                                                                                      |
| Date Submitted by the Author:   | 01-Jul-2019                                                                                                                                                                                                                                                                                                                                                                                                                                                                                                                                                   |
| Complete List of Authors:       | Anyanwu, Philip; Imperial College London, Global Digital Health Unit, Department of Primary Care and Public Health<br>Tonkin-Crine, Sarah ; University of Oxford, Nuffield Department of Primary Care Sciences; University of Oxford, NIHR Health Protection Research Unit in Healthcare Associated Infections and Antimicrobial Resistance<br>Borek , Aleksandra ; University of Oxford, Nuffield Department of Primary Care Sciences<br>Costelloe, Ceire; Imperial College London, Global Digital Health Unit, Department of Primary Care and Public Health |
| <b>Primary Subject Heading</b>: | General practice / Family practice                                                                                                                                                                                                                                                                                                                                                                                                                                                                                                                            |
| Secondary Subject Heading:      | Epidemiology, Health policy, Infectious diseases, Public health                                                                                                                                                                                                                                                                                                                                                                                                                                                                                               |
| Keywords:                       | Antibiotics, Quality Premium Initiative, Resistance, PRIMARY CARE, Mediation analysis, General practice                                                                                                                                                                                                                                                                                                                                                                                                                                                       |
|                                 |                                                                                                                                                                                                                                                                                                                                                                                                                                                                                                                                                               |

SCHOLARONE™  
Manuscripts

1  
2  
3 1 **Title:** Investigating the Mechanism of Impact of the Quality Premium  
4  
5 2 Initiative on Antibiotic Prescribing in Primary Care Practices in  
6  
7 3 England: A Study Protocol.  
8  
9 4

10 5 **Corresponding Author:** **Philip Emeka Anyanwu PhD**  
11  
12 6 Global Digital Health Unit  
13  
14 7 Department of Primary Care and Public Health  
15  
16 8 Faculty of Medicine  
17  
18 9 Imperial College London  
19  
20 10 London, United Kingdom  
21  
22 11 email: anyanwuphilipemeka@gmail.com  
23  
24 12

25 13 **Co-authors:** **Sarah Tonkin-Crine PhD**  
26  
27 14 Nuffield Department of Primary Care Sciences  
28  
29 15 University of Oxford  
30  
31 16 Oxford, United Kingdom  
32  
33 17  
34 18 NIHR Health Protection Research Unit in Healthcare Associated  
35  
36 19 Infections and Antimicrobial Resistance  
37  
38 20 University of Oxford, UK  
39  
40 21

41 22 **Aleksandra Borek PhD**  
42  
43 23 Nuffield Department of Primary Care Sciences  
44  
45 24 University of Oxford  
46  
47 25 Oxford, United Kingdom  
48  
49 26

50 27 **Ceire Costelloe PhD**  
51  
52 28 Global Digital Health Unit  
53  
54 29 Department of Primary Care and Public Health  
55  
56 30 Faculty of Medicine  
57  
58 31 Imperial College London  
59  
60 32 London, United Kingdom  
60 33



## 34 **Abstract**

## 35 **Introduction**

36 The persistent development and spread of resistance to antibiotics remains an important public  
37 health concern in the UK and globally. About 74% of antibiotics prescribed in England in 2016  
38 was in primary care. The Quality Premium (QP) initiative that rewards Clinical Commissioning  
39 Groups (CCGs) financially based on the quality of specific health services commissioned is  
40 one of the National Health Service (NHS) England interventions to reduce antimicrobial  
41 resistance through reduced prescribing. Emerging evidence suggests a reduction in antibiotic  
42 prescribing in primary care practices in the UK following QP initiative. This study aims to  
43 investigate the mechanism of impact of this high-cost health-system level intervention on  
44 antibiotic prescribing in primary care practices in England.

## 45 **Methods and analysis**

46 The study will constitute secondary analyses of antibiotic prescribing data for almost all  
47 primary care practices in England from the NHS England Antibiotic Quality Premium  
48 Monitoring Dashboard and OpenPrescribing covering the period 2013 to 2018. The primary  
49 outcome is the number of antibiotic items per Specific Therapeutic group Age-sex Related  
50 Prescribing Unit (STAR-PU) prescribed monthly in each practice or CCG. We will first  
51 conduct an interrupted time series using Ordinary Least Square regression method to examine  
52 whether antibiotic prescribing rate in England has changed over time, and how such changes,  
53 if any, are associated with QP implementation. Single and sequential multiple-mediator models  
54 using a unified approach for the natural direct and indirect effects will be conducted to  
55 investigate the relationship between QP initiative, the potential mediators and antibiotic  
56 prescribing rate with adjustment for practice and CCG characteristics.

## 57 **Ethics and dissemination**

58 This study will use secondary data that are anonymised and obtained from studies that have  
59 either undergone ethical review or generated data from routine collection systems. Multiple  
60 channels will be used in disseminating the findings from this study to academic and non-  
61 academic audiences.

62

63

60

1  
2  
3 64 **Strengths and Limitations of this study**  
4  
5

- 6 65 • This study will be the first to evaluate the mechanism of the impact of a financial  
7 66 incentive initiative involving Clinical Commissioning Groups to improve antibiotic  
8 67 prescribing in primary care practices in England.  
9  
10 68 • The investigation of multiple mediators in this study will help to identify the  
11 69 contributions of multiple strategies in translating the effects of QP while unpacking the  
12 70 extent of the effect of specific mediators.  
13  
14 71 • Due to the limited data on practice-level interventions or strategies that might  
15 72 potentially mediate the effect of the QP on antibiotic prescribing, we will not be able to  
16 73 extensively investigate the mechanism of QP impact at the practice level.  
17  
18 74 • Nevertheless, extensive investigations will be conducted at CCG level where the  
19 75 Quality Premium initiative is implemented, and rewards paid out.  
20  
21  
22  
23  
24  
25  
26  
27  
28  
29  
30  
31  
32  
33  
34  
35  
36  
37  
38  
39  
40  
41  
42  
43  
44  
45  
46  
47  
48  
49  
50  
51  
52  
53  
54  
55  
56  
57  
58  
59  
60

## 77 Introduction

78 The persistent development and spread of resistance to antimicrobials, especially antibiotics,  
79 remains an important public health concern in the UK<sup>1</sup> and globally.<sup>2,3</sup> Antimicrobial resistance  
80 (AMR) is a major threat to the treatment and control of infectious diseases as drug-resistant  
81 infections are characterised by prolonged morbidity, increased risk of disabilities, death, and  
82 cost of healthcare.<sup>4</sup> A 2014 review estimated that consistent increases in AMR would lead to  
83 about 10 million deaths per year by 2050.<sup>5</sup> Inappropriate prescribing and use of antibiotics in  
84 healthcare practices, especially primary care, are integral to the development and spread of  
85 resistance.<sup>6,7</sup>

86 About seventy-four per cent of the antibiotics prescribed in England in 2016 was in primary  
87 care.<sup>8</sup> The high rate of antibiotic prescribing in primary care has been associated with increased  
88 antimicrobial resistance.<sup>9</sup> While some of the antibiotics prescribed in primary care settings are  
89 appropriate, a substantial proportion are cases where antibiotics are not clinically indicated,  
90 such as suspected respiratory tract conditions which can be self-limiting.<sup>9,10</sup> Uncertainties about  
91 diagnosis, (perceived) patient expectations for antibiotics, occupational pressure (e.g.  
92 consultation rate) and previous experiences, are some of the identified drivers of  
93 overprescribing in primary care practices.<sup>11-16</sup>

94 Interventions such as antibiotic stewardship programmes, education and training initiatives  
95 targeted at prescribers and patients, financial incentives, among others have been implemented  
96 in England to reduce antimicrobial resistance through reduced prescribing. In particular, the  
97 Quality Premium (QP) is an National Health Service (NHS) England initiative established in  
98 2013 to reward Clinical Commissioning Groups (CCGs) financially based on the quality of  
99 specific health services considered to be of national or local priority and commissioned over a  
100 specific period.<sup>17</sup> Improvement of antibiotic prescribing in primary care was one of the national  
101 priorities in the 2015/16 guidance,<sup>18</sup> constituting 10% of the premium awarded from 2016/17  
102 to date.<sup>19,20</sup> Key aspects of the 'improved antibiotic prescribing' priority are reductions in the  
103 number of antibiotics prescribed in primary care facilities across England, and in the proportion  
104 of broad-spectrum antibiotics prescribed in primary care (2015-2017).<sup>19</sup> Part of the  
105 requirements in the 2015/16 QP guidance for demonstrating improved antibiotic prescribing  
106 by CCGs was a reduction in the number of antibiotics prescribed in primary care by 1% of the  
107 mean value in England in 2013/14 (i.e. 1.61 items per Specific Therapeutic group Age-sex

1  
2  
3 108 Related Prescribing Unit (STAR-PU)). This was further increased to 4% in the 2016/17  
4  
5 109 guidance.

6  
7  
8 110 Emerging evidence suggests a reduction in antibiotic prescribing in primary care practices in  
9  
10 111 the UK following the QP initiative.<sup>21,22</sup> Prescribing data from England shows a reduction of  
11  
12 112 about 2.7 million antibiotic items between 2014/15 and 2016/17 financial year.<sup>23</sup> Eighty-eight  
13  
14 113 per cent of the CCGs in England achieved the target of reducing antibiotic prescribing in the  
15  
16 114 first two years of QP.<sup>21</sup> Also, there has been a significant reduction in the proportion of broad-  
17  
18 115 spectrum antibiotics prescription with 83% of the CCGs meeting their target in the first two  
19  
20 116 years.<sup>21</sup> Such reductions in antibiotic prescribing would be expected to contribute to reductions  
21  
22 117 in the development of resistance.<sup>24</sup> However, little is known about the mechanisms by which  
23  
24 118 the QP initiative impacted on antibiotic prescribing in primary care practices.

25  
26 119 The impact of interventions on specific outcomes are sometimes explained by a series of  
27  
28 120 events. Potential mediators are important in assessing causal relationships like that between QP  
29  
30 121 and antibiotic prescribing in primary care practices in England; where a *potential mediator* is  
31  
32 122 a variable that hypothetically mediates the effect of QP on the outcome. The conceptual model  
33  
34 123 shown in fig.1 demonstrates the hypothesised pathways for the impact of the QP initiative on  
35  
36 124 antibiotic prescribing, and subsequently AMR. The model is developed based on conceptual  
37  
38 125 and empirical evidence from existing literature and the results of qualitative and survey studies  
39  
40 126 conducted as initial stages of the broader STEP-UP (Improving the uptake and Sustainability  
41  
42 127 of Effective interventions to promote Prudent antibiotic Use in Primary care)<sup>25</sup> project that  
43  
44 128 includes the current study. The conceptual model will be further validated through a  
45  
46 129 stakeholder workshop with key antibiotic stewardship personnel, primary care prescribers, and  
47  
48 130 CCG representatives.

49  
50 131 Our conceptual model suggests that in addition to its direct impact, the QP initiative acts by  
51  
52 132 stimulating and enhancing the adoption of existing strategies to reduce and optimise antibiotic  
53  
54 133 prescribing. In investigating the potential pathways connecting QP to reductions in antibiotic  
55  
56 134 prescribing, we will be examining the hypothesis that factors like the Chief Medical Officer's  
57  
58 135 (CMO) letter, TARGET toolkit, antibiotic auditing, benchmarking, local incentives at CCG  
59  
60 136 level, prescribers and patients' antimicrobial stewardship (AMS) education/training can  
137  
138 137 transmit part of the influence of the QP initiative to antibiotic prescribing.

138 **[insert fig. 1]**

1  
2  
3 139 First implemented in September 2014, the CMO letter, which provided social norm feedback  
4  
5 140 to primary care practitioners in England whose antibiotic prescribing rate was in the top 20%,  
6  
7 141 reduced antibiotic prescribing by 3.3% in six months in a randomised trial.<sup>26</sup> The criteria for  
8  
9 142 selecting practices that received the letters in the subsequent years changed with the addition  
10  
11 143 of measures like a change in antibiotic prescribing over time, and whether practices have  
12  
13 144 previously been sent CMO letter.

14 145 Another important mediator hypothesised in our conceptual model is AMS education/training  
15  
16 146 of prescribers and patients. Educating and training prescribers on the importance of antibiotic  
17  
18 147 stewardship and ways to promote prudence can help prescribers make better decisions on when  
19  
20 148 an antibiotic is indicated and can also improve patients' knowledge on the appropriate use of  
21  
22 149 antibiotics. AMS interventions targeted at patients can improve their knowledge of when  
23  
24 150 antibiotics are not needed, increase confidence and skills on how to self-care, which can result  
25  
26 151 in reduced consultations for self-limiting illness and thus reduced antibiotic prescriptions.

27 152 Treat Antibiotics Responsibly, Guidance, Education, Tools (TARGET) is a toolkit developed  
28  
29 153 by the Public Health England, the Royal College of General Practitioners and other  
30  
31 154 professional societies to promote prudent antibiotic use among prescribers and patients in  
32  
33 155 primary care.<sup>27</sup> The intervention comprises of multiple resources (patient information leaflets  
34  
35 156 on infection management and antibiotic use, self-assessment checklist for prescribers,  
36  
37 157 antibiotic audit toolkits, interactive workshop presentations, national antibiotic management  
38  
39 158 guidance, training resources, and resources for clinical and waiting areas) to provide clinicians  
40  
41 159 and patients with the motivation and skills to use antibiotics prudently.<sup>27</sup> A qualitative study  
42  
43 160 evaluating prescribers' attitude and perception about the TARGET toolkit reported that general  
44  
45 161 practitioners described it as useful and important in improving their prescribing behaviours and  
46  
47 162 the expectations of their patients.<sup>28</sup> The use of resources like the TARGET antibiotics  
48  
49 163 workshop have been shown to reduce antibiotic prescribing rate in a randomised controlled  
50  
51 164 trial.<sup>29</sup>

52 165 We hypothesise that the implementation of the QP initiative informed the initiation or wider  
53  
54 166 use of these strategies indicated in the conceptual model as mediators, which will subsequently  
55  
56 167 influence antibiotic prescribing at primary care practices.

57 168 The implementation of the QP initiative in NHS England constitutes a natural experiment and  
58  
59 169 offers an opportunity to investigate the pre and post-intervention periods to understand the  
60  
170 mechanism of impact of the QP intervention in reducing antibiotic prescribing rates across the

1  
2  
3 171 whole of primary care.<sup>30</sup> Given the ethical and practical constraints in manipulating exposure  
4  
5 172 in such an intervention, a natural experimental design offers a practical approach to understand  
6  
7 173 the overall effect and mechanism of interventions like QP that offer financial incentives for  
8  
9 174 clinical compliance. The publication of the 2015/16 QP Guidance<sup>18</sup> constitutes the  
10  
11 175 'intervention', with periods before this as the 'control'.

## 12 176 **Study Aim and Objectives**

15 177 Using routinely collected population-level datasets on antibiotic prescribing in England, this  
16  
17 178 study aims to address the research question: What are the mechanisms and mediators of the  
18  
19 179 impact of a high-cost health-system level intervention, the 'antibiotic prescribing quality  
20  
21 180 premium'? We will investigate the difference in antibiotic prescribing rate pre and post-QP  
22  
23 181 initiative to establish its direct, indirect (through mediators), and total effects in reducing  
24  
25 182 antibiotic prescribing in primary care practices in England.

## 26 183 **Methods and Analysis**

### 28 184 **Study Design**

30  
31 185 Contemporary evaluations of the effectiveness of health policies go beyond estimating their  
32  
33 186 total effect on outcomes. Mediation analysis decomposes the total effect of an intervention into  
34  
35 187 separate causal pathways,<sup>31</sup> enabling an understanding of why and how policies work by  
36  
37 188 estimating the direct and indirect effects of the exposure.<sup>32</sup> We will conduct mediation analyses  
38  
39 189 investigating the potential mediators of the impact of QP on antibiotic prescribing in primary  
40  
41 190 care in England, establishing the direct and indirect effects of the QP initiative.

### 42 191 **Data sources**

44 192 The study will constitute secondary analyses of antibiotic prescribing data from NHS England  
45  
46 193 covering the period 2013 to 2018. CCGs were established in England in April 2013 following  
47  
48 194 the Health and Social Care Act 2012.<sup>33</sup> Data on antibiotic prescribing in primary care at CCG  
49  
50 195 levels will be sourced from the NHS England Antibiotic Quality Premium Monitoring  
51  
52 196 Dashboard, which is produced by the NHS Business Services Authority (BSA).<sup>34</sup> Primary Care  
53  
54 197 prescribing data is publicly available from the NHS BSA website. The dataset contains the  
55  
56 198 number of antibiotic items (STAR-PU) prescribed in each CCG from the financial year 2015/16  
57  
58 199 to 2018/19, with data for October 2018 the latest at the time of this protocol. Data for the period  
59  
60 200 2013 to 2015 will be mapped to CCG-level from the practice-level data.

1  
2  
3 201 Practice-level antibiotic prescribing data will be sourced from OpenPrescribing, an Evidence-  
4  
5 202 Based Medicine DataLab project by the University of Oxford. OpenPrescribing publishes  
6  
7 203 monthly antibiotics prescribing data from August 2013, with data for October 2018 the latest  
8  
9 204 at the time of this protocol. Practice-level antibiotic prescribing data from OpenPrescribing is  
10  
11 205 not STAR-PU weighted, so the extracted data will be STAR-PU weighted using figures from  
12  
13 206 the 2013 Item-based age–sex weighting for oral antibacterials,<sup>14</sup> and the number of registered  
14  
15 207 patients in each age-gender category in a practice for each specific month.

16 208 Overall, the dataset offers coverage of at least three years post-intervention given that antibiotic  
17  
18 209 prescribing became a QP priority in March 2015. This will be important in investigating the  
19  
20 210 immediate direct and indirect effects of the QP initiative while giving an insight into the  
21  
22 211 sustainability of the identified effects (if any) in the long-term.

### 23 212 **Variables**

24  
25  
26 213 The predictor will be a binary variable indicating the implementation of the QP intervention.  
27  
28 214 The intervention will include all periods after March 2015 when the 2015/16 QP guidance in  
29  
30 215 England was published, while the control will be periods prior to this. The primary outcome of  
31  
32 216 interest is the rates of antibiotic prescribing at CCG level in England, which will be a  
33  
34 217 continuous variable indicating the number of items (per STAR-PU) prescribed per month.

35 218 To account for differences in practice and CCG characteristics that can contribute to variance  
36  
37 219 in antibiotic prescribing, we will be adjusting for the number of General Practitioners in each  
38  
39 220 practice (from the NHS Workforce data),<sup>35</sup> the index of multiple deprivation (from the  
40  
41 221 Department for Communities and Local Government),<sup>36</sup> prevalence of co-morbidities (asthma,  
42  
43 222 chronic obstructive pulmonary disease (COPD), diabetes, cancer, chronic kidney disease (from  
44  
45 223 the NHS Quality and Outcomes Framework database)),<sup>37</sup> the prescribing rate of other non-  
46  
47 224 antibiotic drugs (Opioids and Benzodiazepines), and seasonal flu vaccination rate (from Public  
48  
49 225 Health England).<sup>38</sup>

50 226 Mediator variables will be derived from the questionnaire data from a Public Health England  
51  
52 227 (PHE) survey<sup>39</sup> with 187 of the 209 AMS leads representing CCGs in England and data from  
53  
54 228 other organizations that have evaluated the interventions treated as potential mediators in this  
55  
56 229 study. In the PHE survey, participants were required to complete questionnaire items which  
57  
58 230 included their adoption of national and local strategies in their respective CCG to enable them  
59  
60 231 to meet QP targets on antibiotic prescribing in primary care. The mediator variables will be  
232 232 binary or continuous variables indicating the adoption of key interventions and intermediaries



233 that are hypothesised to reflect in the integration of the QP guidance in improving antibiotic  
234 prescribing in primary care practices.

### 235 **Handling missing data**

236 Over the period covered by this study (2013-2018), there have been changes in the number of  
237 practices and CCGs in England. Some practices have closed, new practices opened, and some  
238 CCGs merged over the period; as such we have missing values for some observations. To  
239 maximize the use of existing observations, we will retain all observed values in the main  
240 analysis and impute the missing values using multiple approaches.<sup>40</sup> Missing values for the  
241 period before a new CCG was formed through merger of pre-existing CCGs will be imputed  
242 using the mean value of the CCGs that constitutes the merger; subsequently, these closed CCGs  
243 will be dropped from the dataset. Other missing values in this study will be handled using  
244 multiple imputation method on Mplus V.8.2. We will run a separate imputation model for the  
245 practice and CCG level datasets, the results will be averaged across 20 imputed datasets.  
246 Complete case analysis will be conducted as part of the sensitivity analyses for this study to  
247 examine the consistency of the results from the imputed set.

### 248 **Statistical analysis**

249 Our first analysis will be an interrupted time series to investigate whether antibiotic prescribing  
250 rate in England has changed over time, and how such changes, if any, are associated with the  
251 QP implementation in March 2015. This will be conducted using the Ordinary Least Square  
252 regression method<sup>41</sup> to assess whether the 2015/16 QP establishment resulted in a shift in the  
253 level and trend in antibiotic prescribing in primary care in England, compared to the period  
254 before the intervention. Using the practice-level dataset, a univariate time series with the mean  
255 antibiotic items (STAR-PU weighted) prescribed in all primary care practices in England for  
256 each month will be conducted using the *ITSA* function on Stata, with *posttrend* specification to  
257 show a post-intervention trend. The Cumby-Huizinga general test for autocorrelation will be  
258 used for general specification test of serial correlation in the time series data.<sup>42</sup>

259 A new Quality Premium guideline was implemented each financial year with changes in the  
260 prescribing rate target and the proportion that improved prescribing constituted in the QP award  
261 for each year. Our mediation analyses will investigate the effects of the QP by comparing  
262 antibiotic prescribing rate in the financial year before its implementation to each subsequent  
263 year post-implementation; as such our dataset for the mediation analyses will have the control  
264 group as the financial year before QP and the intervention group as a specific post-QP



1  
2  
3 265 implementation year. Three analyses will be conducted for each of the three financial years  
4  
5 266 since QP establishment. This will enable us to compare the effects of the different target levels  
6  
7 267 that have been set over the years, and the proportions of the QP award attributed to  
8  
9 268 improvement in antibiotic prescribing.

10  
11 269 Using a unified model for the natural direct and indirect effects,<sup>31</sup> we will investigate the  
12  
13 270 relationship between the QP initiative, the potential mediators and antibiotic prescribing rate  
14  
15 271 with adjustment for the practice and CCG characteristics. This approach addresses the issues  
16  
17 272 associated with the traditional approach to mediation analysis that obtains natural direct and  
18  
19 273 indirect effect estimates through a nontrivial combination of parameter estimates from multiple  
20  
21 274 models for the regression of the mediator and that of the outcome.<sup>43,44</sup> Also, the unified model  
22  
23 275 is applicable to nonlinear regressions, different measurement types for outcome and mediator  
24  
25 276 variables, and allows for interaction between the exposure and the mediator.<sup>31</sup>

26  
27 277 We will first fit single-mediator models with each mediator separately modelled using the  
28  
29 278 *medeff* function in Stata.<sup>45</sup> With the single-mediator models, we will be able to establish the  
30  
31 279 individual influence of each potential mediator variable. Variables that showed a mediating  
32  
33 280 effect in the single mediator models will be added to build a multiple-mediator model using a  
34  
35 281 sequential mediation analysis method.<sup>46</sup>

36  
37 282 A sequential multiple mediators analysis is preferred to merely summing the effects of the  
38  
39 283 single mediators because this sum may differ from the joint mediated effect; particularly as our  
40  
41 284 potential mediators may influence one another.<sup>46</sup> Modelling all the significant mediators  
42  
43 285 together provides a more accurate assessment of the mediation effects and causal  
44  
45 286 relationship<sup>47,48</sup> while assessing the indirect effect of a group of mediators in explaining how  
46  
47 287 and why the intervention impacts on the outcome. The ordering of the mediators in the  
48  
49 288 sequential mediation analysis will be based on evidence from the literature and the outcome of  
50  
51 289 our stakeholders' workshop designed to identify possible pathways between the predictor,  
52  
53 290 mediators and outcome. The workshop which will validate of our conceptual model, will also  
54  
55 291 enable us to identify what mediators affect one another and inform interactions to include in  
56  
57 292 our model. All analysis will be conducted in the Stata statistical package version 15.1.

### 58 293 **Sensitivity analyses**

59  
60 294 Sensitivity analyses using dummy implementation dates of one to three months before and after  
61  
62 295 the actual month each of the QP guidance were published will be conducted to assess the  
63  
64 296 difference between the time the guidance is published and the dissemination of information

297 and development of local arrangements by the CCGs. These analyses will further help to  
298 investigate the anticipatory effect of the policy and whether lag in implementation attenuates  
299 the effect of the intervention.

300 Also, we will conduct separate analysis with the outcome variable (antibiotic prescribing rate)  
301 as a binary variable (indicating whether each CCG achieved the required rate of reduction in  
302 antibiotic prescribing as stated in the QP guidance for each year) to examine whether the  
303 classification of the outcome variable based on achievement of QP target influences the results.

304 Subgroup analyses will be conducted on clusters of primary care practices based on their  
305 antibiotic prescribing behaviour (high and low prescribers) and indices of deprivation to  
306 examine whether any effect of the QP initiative seen in the overall population is different in  
307 subgroups of practices. The top and bottom 20% antibiotic prescribers as of March 2015 will  
308 be categorised as high and low prescribers. To address the issue of regression to mean in  
309 subgroup analyses, we will build a separate model with categorization into high and low  
310 prescribers based on the mean of the prescribing rate of practices in the last three months to  
311 March 2015. The use of mean of multiple measures will offer a better estimate of each  
312 practice's true mean before the 2015/16 Quality Premium initiative.<sup>49</sup> The subgroup analysis  
313 based on the indices of deprivation data<sup>36,50</sup> at primary-care practice level will be important in  
314 establishing the equity impact of the QP initiative.

### 315 **Limitations**

316 This study has some limitations. The survey that provided data on mediator variables included  
317 187 of the 209 CCGs existing as at the time of the study. However, this sample size is large  
318 enough for strong statistical power, and multiple imputation will be used to address issues on  
319 missingness. Furthermore, due to the limited data on practice-level interventions or strategies  
320 that might potentially mediate the effect of the QP on antibiotic prescribing, we will not be able  
321 to extensively investigate the mechanism of QP impact at the practice level. Nevertheless,  
322 extensive investigations will be conducted at CCG-level where we have more data on potential  
323 mediators.

324 In 2013, the Primary Care Trusts (PCTs) in England, which were responsible for planning and  
325 commissioning health care services at the primary care level, were transformed to Clinical  
326 Commissioning Groups.<sup>51</sup> As such, our investigations are restricted to the CCG era. This is  
327 important as the Quality Premium initiative is implemented, and rewards paid out at CCG level.

1  
2  
3 328 We recognise that the causal interpretation of any effect from our mediation analysis rests on  
4  
5 329 assumptions such as sequential ignorability and exchangeability. Causal inference from this  
6  
7 330 analysis will be limited given that our data is observational with the absence of random  
8  
9 331 assignment of cases to treatment and mediator levels, as well as the likelihood of unmeasured  
10  
11 332 confounders. The rate of consultation for conditions where antibiotics might be prescribed is  
12  
13 333 one of the unmeasured confounders in our study. This has not been accounted for in our  
14  
15 334 analyses as this data is not available nationally at the practice level.

## 16 335 **Discussion**

17  
18 336 Although the Quality Premium intervention has been reported to have been effective in  
19  
20 337 reducing antibiotic prescribing,<sup>22</sup> there remain important gaps in the evidence base for this  
21  
22 338 intervention, especially in relation to its mechanism of impact. This study will be the first to  
23  
24 339 evaluate the mechanism of the impact of a financial incentive initiative involving CCGs to  
25  
26 340 improve antibiotic prescribing in primary care practices in England. If our study identifies some  
27  
28 341 key mediators, like other interventions implemented in similar time or in response to the QP  
29  
30 342 initiative, that explain the indirect effect of the QP intervention on antibiotic prescribing, this  
31  
32 343 will provide important evidence on the effectiveness of the implementation of a package of  
33  
34 344 interventions on antibiotic prescribing. The investigation of multiple mediators in this study  
35  
36 345 will also help to highlight the contributions of multiple factors in translating the effects of QP  
37  
38 346 while unpacking the extent of the effect of specific mediators.

39  
40 347 Evidence on the mechanism of impact of strategies like QP will be important in improving its  
41  
42 348 uptake and sustainability while maximizing its potential in reducing antibiotic prescribing in  
43  
44 349 primary care settings.

45  
46 350 Finally, financially-incentivized strategies for clinical compliance have been criticised for their  
47  
48 351 ability to result in unintended consequences.<sup>52</sup> In the case of the QP initiative, unintended  
49  
50 352 consequences like not prescribing antibiotics in cases where they are indicated are possible.  
51  
52 353 However, some of the QP response strategies that we hypothesised as potential mediators (such  
53  
54 354 as prescribers' AMS education/training) have the ability to mitigate this unintended  
55  
56 355 consequence. By comparing the prescribing rate before and after the QP initiative and  
57  
58 356 identifying the strategies that explain its effect, we will generate evidence that will be important  
59  
60 357 in considerations of the future of this intervention and revisions that may help reduce potential  
358 unintended consequences.

## 359 **Patient and public involvement**

1  
2  
3 360 This study will use secondary data mostly from routine collection system and will not directly  
4  
5 361 involve patients or the public. The dissemination of the results will include communication  
6  
7 362 channels and public engagement events that will involve primary care practitioners and CCG  
8  
9 363 representatives.

### 10 364 **Ethics and dissemination**

11  
12  
13 365 This study will use secondary data that are anonymised and obtained from studies that have  
14  
15 366 either undergone ethical review or generated data from routine collection systems. Prescribing  
16  
17 367 data from NHS BSA and NHS Digital are generated from routinely collected prescribing data  
18  
19 368 on items that have been dispensed in primary care practices in England. The survey that  
20  
21 369 produced the data on mediator variables was registered with the Public Health England  
22  
23 370 Research Support and Governance Office (RSGO) and approved by Public Health England  
24  
25 371 Research Ethics and Governance Group (REGG) and Health Research Association (HRA).

26 372 Multiple channels will be used in disseminating the findings from this study to academic and  
27  
28 373 non-academic audiences. With will include an engagement workshop with our stakeholder  
29  
30 374 network, presentations in scientific conferences, publication in peer-reviewed journals, press  
31  
32 375 conference coinciding with paper publications.

### 33 376 **Funding**

34  
35  
36 377 This study is funded by the Economics and Social Research Council (ES/P008232/1). STC  
37  
38 378 received funding from the National Institute for Health Research Health Protection Research  
39  
40 379 Unit (NIHR HPRU) in Healthcare Associated Infections and Antimicrobial Resistance at the  
41  
42 380 University of Oxford in partnership with Public Health England (PHE) [HPRU-2012-10041].  
43  
44 381 The views expressed are those of the author(s) and not necessarily those of the NHS, the NIHR,  
45  
46 382 the Department of Health and Social Care or Public Health England. The funding body will  
47  
48 383 not play any role in the design or conduct of the study. CC is supported via an NIHR Career  
49  
50 384 Development Fellowship (NIHR-2016-09-015).

### 51 385 **Authors contributions**

52  
53 386 All authors contributed to the conception and study design. PA and CC developed the analysis  
54  
55 387 plan. The manuscript was drafted by PA with further input from CC, STC and AB. All authors  
56  
57 388 approved the submission of the manuscript.

### 58 389 **Competing Interests**

1  
2  
3 390 None declared.  
4

5  
6 391 **Data sharing statement**  
7

8 392 This study will use secondary data that is publicly available to bona fide researchers. The data  
9  
10 393 from the Public Health England survey can be sourced from the organization.  
11

12 394 **References**  
13

- 14 395 1. Department of Health. *UK five year antimicrobial resistance strategy 2013 to 2018*.  
15  
16 396 (Department of Health London, 2013).  
17  
18 397 2. United Nations. Draft political declaration of the high-level meeting of the General  
19  
20 398 Assembly on antimicrobial resistance. (2016).  
21  
22 399 3. *Antimicrobial resistance: global report on surveillance*. (World Health Organization,  
23  
24 400 2014).  
25  
26 401 4. World Health Organization. Antimicrobial resistance fact sheet. *WHO Geneva* (2018).  
27  
28 402 5. O'Neill, J. Antimicrobial resistance: tackling a crisis for the health and wealth of nations.  
29  
30 403 *Rev. Antimicrob. Resist* **20**, 1–16 (2014).  
31  
32 404 6. Bell, B. G., Schellevis, F., Stobberingh, E., Goossens, H. & Pringle, M. A systematic  
33  
34 405 review and meta-analysis of the effects of antibiotic consumption on antibiotic resistance.  
35  
36 406 *BMC infectious diseases* **14**, 13 (2014).  
37  
38 407 7. Ashraf, M. S. & Cook, P. P. Antibiotic misuse in hospital, outpatient, and long-term care  
39  
40 408 settings. *North Carolina medical journal* **77**, 346–349 (2016).  
41  
42 409 8. Public Health England. English Surveillance Programme for Antimicrobial Utilisation and  
43  
44 410 Resistance (ESPAUR). (2014).  
45  
46 411 9. Costelloe, C., Metcalfe, C., Lovering, A., Mant, D. & Hay, A. D. Effect of antibiotic  
47  
48 412 prescribing in primary care on antimicrobial resistance in individual patients: systematic  
49  
50 413 review and meta-analysis. *BMJ* **340**, c2096 (2010).  
51  
52  
53  
54  
55  
56  
57  
58  
59  
60

- 1  
2  
3 414 10. Dekker, A. R., Verheij, T. J. & van der Velden, A. W. Inappropriate antibiotic prescription  
4  
5 415 for respiratory tract indications: most prominent in adult patients. *Family practice* **32**, 401–  
6  
7 416 407 (2015).  
8  
9  
10 417 11. Cotter, M. & Daly, L. Antibiotic prescription practices of general practitioners. *Irish*  
11  
12 418 *medical journal* **100**, 598–600 (2007).  
13  
14  
15 419 12. Coenen, S., Michiels, B., Renard, D., Denekens, J. & Royen, P. V. Antibiotic prescribing  
16  
17 420 for acute cough: the effect of perceived patient demand. *Br J Gen Pract* **56**, 183–190  
18  
19 421 (2006).  
20  
21  
22 422 13. Macfarlane, J., Holmes, W., Macfarlane, R. & Britten, N. Influence of patients’  
23  
24 423 expectations on antibiotic management of acute lower respiratory tract illness in general  
25  
26 424 practice: questionnaire study. *BMJ* **315**, 1211–1214 (1997).  
27  
28  
29 425 14. Pouwels, K. B., Dolk, F. C. K., Smith, D. R. M., Smieszek, T. & Robotham, J. V.  
30  
31 426 Explaining variation in antibiotic prescribing between general practices in the UK. *J*  
32  
33 427 *Antimicrob Chemother* **73**, ii27–ii35 (2018).  
34  
35  
36 428 15. Tonkin-Crine, S., Yardley, L. & Little, P. Antibiotic prescribing for acute respiratory tract  
37  
38 429 infections in primary care: a systematic review and meta-ethnography. *J Antimicrob*  
39  
40 430 *Chemother* **66**, 2215–2223 (2011).  
41  
42  
43 431 16. Germen, E. *et al.* Antibiotic prescribing for acute respiratory tract infections in primary  
44  
45 432 care: an updated and expanded meta-ethnography. *Br J Gen Pract* **68**, e633–e645 (2018).  
46  
47  
48 433 17. NHS England. Quality Premium: 2014/15 guidance for CCGs. (2014).  
49  
50 434 18. NHS England. *Quality Premium: 2015/16 guidance for CCGs. 2015.* (2015).  
51  
52 435 19. NHS England. *Quality Premium Guidance for 2016/17.* (2016).  
53  
54 436 20. NHS England. *Technical guidance for refreshing NHS Plans 2018/19 Annex B:*  
55  
56 437 *Information on Quality Premium.* (2017).  
57  
58  
59  
60



- 1  
2  
3 438 21. Public Health England. English Surveillance Programme for Antimicrobial Utilisation and  
4  
5 439 Resistance (ESPAUR): Report 2017. (2017).  
6  
7  
8 440 22. Bou-Antoun, S. *et al.* Age-related decline in antibiotic prescribing for uncomplicated  
9  
10 441 respiratory tract infections in primary care in England following the introduction of a  
11  
12 442 national financial incentive (the Quality Premium) for health commissioners to reduce use  
13  
14 443 of antibiotics in the community: an interrupted time series analysis. *Journal of*  
15  
16 444 *Antimicrobial Chemotherapy* **73**, 2883–2892 (2018).  
17  
18  
19 445 23. Public Health England. English surveillance programme for antimicrobial utilisation and  
20  
21 446 resistance (ESPAUR) Report 2018. (2018).  
22  
23  
24 447 24. Butler, C. C. *et al.* Containing antibiotic resistance: decreased antibiotic-resistant coliform  
25  
26 448 urinary tract infections with reduction in antibiotic prescribing by general practices. *Br J*  
27  
28 449 *Gen Pract* **57**, 785–792 (2007).  
29  
30  
31 450 25. UK Research and Innovation. Improving the uptake and SusTainability of Effective  
32  
33 451 interventions to promote Prudent antibiotic Use in Primary care (STEP-UP). *UK Research*  
34  
35 452 *and Innovation* (2017).  
36  
37  
38 453 26. Hallsworth, M. *et al.* Provision of social norm feedback to high prescribers of antibiotics  
39  
40 454 in general practice: a pragmatic national randomised controlled trial. *The Lancet* **387**,  
41  
42 455 1743–1752 (2016).  
43  
44  
45 456 27. Royal College of General Practitioners. *Target antibiotics toolkit*. (London, 2012).  
46  
47 457 28. Jones, L. F. *et al.* An evaluation of the TARGET (Treat Antibiotics Responsibly; Guidance,  
48  
49 458 Education, Tools) Antibiotics Toolkit to improve antimicrobial stewardship in primary  
50  
51 459 care—is it fit for purpose? *Fam Pract* **35**, 461–467 (2018).  
52  
53  
54 460 29. McNulty, C. *et al.* Effects of primary care antimicrobial stewardship outreach on antibiotic  
55  
56 461 use by general practice staff: pragmatic randomized controlled trial of the TARGET  
57  
58 462 antibiotics workshop. *J Antimicrob Chemother* **73**, 1423–1432 (2018).  
59  
60

- 1  
2  
3 463 30. Craig, P. *et al.* Using natural experiments to evaluate population health interventions: new  
4  
5 464 MRC guidance. *J Epidemiol Community Health* **66**, 1182–1186 (2012).  
6  
7  
8 465 31. Lange, T., Vansteelandt, S. & Bekaert, M. A Simple Unified Approach for Estimating  
9  
10 466 Natural Direct and Indirect Effects. *Am J Epidemiol* **176**, 190–195 (2012).  
11  
12 467 32. Petersen, M. L., Sinisi, S. E. & van der Laan, M. J. Estimation of direct causal effects.  
13  
14 468 *Epidemiology* 276–284 (2006).  
15  
16  
17 469 33. Great Britain Department of Health. *Health and Social Care Act 2012*. (The Stationery  
18  
19 470 Office, 2012).  
20  
21 471 34. NHS Business Services Authority. Information Services Portal. Detailed Prescribing  
22  
23 472 Information. (2018).  
24  
25  
26 473 35. NHS Digital. Workforce Data. *NHS Digital* (2018). Available at:  
27  
28 474 <https://digital.nhs.uk/data-and-information/areas-of-interest/workforce>. (Accessed: 19th  
29  
30 475 February 2019)  
31  
32  
33 476 36. Department for Communities and Local Government. The English Indices of Deprivation  
34  
35 477 2015 – Frequently Asked Questions (FAQs). (2016).  
36  
37  
38 478 37. NHS Quality and Outcome Frameworks. Quality and Outcomes Framework, Achievement,  
39  
40 479 prevalence and exceptions data - 2017-18 [PAS]. (2018).  
41  
42  
43 480 38. Public Health England. Seasonal flu vaccine uptake in GP patients: monthly data, 2018 to  
44  
45 481 2019. (2019).  
46  
47 482 39. Allison, R. *et al.* Local implementation of AMS initiatives: a mixed-methods study. *Br J*  
48  
49 483 *Gen Pract* **68**, bjgp18X697025 (2018).  
50  
51  
52 484 40. Sterne, J. A. *et al.* Multiple imputation for missing data in epidemiological and clinical  
53  
54 485 research: potential and pitfalls. *Bmj* **338**, b2393 (2009).  
55  
56  
57 486 41. Linden, A. Conducting interrupted time-series analysis for single-and multiple-group  
58  
59 487 comparisons. *Stata J* **15**, 480–500 (2015).  
60



- 1  
2  
3 488 42. Baum, C. F. & Schaffer, M. E. A general approach to testing for autocorrelation. *Retrieved*  
4  
5 489 *May 7, 2015* (2013).  
6  
7  
8 490 43. Petersen, M. L., Sinisi, S. E. & van der Laan, M. J. Estimation of Direct Causal Effects.  
9  
10 491 *Epidemiology* **17**, 276–284 (2006).  
11  
12 492 44. VanderWeele, T. J. & Vansteelandt, S. Conceptual issues concerning mediation,  
13  
14 493 interventions and composition. *Statistics and its Interface* **2**, 457–468 (2009).  
15  
16 494 45. Hicks, R. & Tingley, D. MEDIATION: Stata module for causal mediation analysis and  
17  
18 495 sensitivity analysis. (2012).  
19  
20 496 46. VanderWeele, T. J. & Vansteelandt, S. Mediation Analysis with Multiple Mediators.  
21  
22 497 *Epidemiol Method* **2**, 95–115 (2014).  
23  
24 498 47. MacKinnon, D. P., Krull, J. L. & Lockwood, C. M. Equivalence of the mediation,  
25  
26 499 confounding and suppression effect. *Prevention science* **1**, 173–181 (2000).  
27  
28 500 48. MacKinnon, D. P., Fairchild, A. J. & Fritz, M. S. Mediation analysis. *Annu. Rev. Psychol.*  
29  
30 501 **58**, 593–614 (2007).  
31  
32 502 49. Barnett, A. G., van der Pols, J. C. & Dobson, A. J. Regression to the mean: what it is and  
33  
34 503 how to deal with it. *Int J Epidemiol* **34**, 215–220 (2005).  
35  
36 504 50. Smith, T. *et al.* The English indices of deprivation 2015. *London: Department for*  
37  
38 505 *Communities and Local Government* (2015).  
39  
40 506 51. Department of Health. Health and Social Care Act 2012. (2012). Available at:  
41  
42 507 [http://www.legislation.gov.uk/ukpga/2012/7/pdfs/ukpga\\_20120007\\_en.pdf](http://www.legislation.gov.uk/ukpga/2012/7/pdfs/ukpga_20120007_en.pdf). (Accessed:  
43  
44 508 9th October 2018)  
45  
46 509 52. Campbell, S. M., Reeves, D., Kontopantelis, E., Sibbald, B. & Roland, M. Effects of pay  
47  
48 510 for performance on the quality of primary care in England. *New England Journal of*  
49  
50 511 *Medicine* **361**, 368–378 (2009).  
51  
52  
53  
54  
55  
56  
57  
58  
59  
60

**Fig. 1: Conceptual model. The direct effect is represented by the path between the QP initiative (predictor) and antibiotic prescribing rate (outcome).**

For peer review only



Fig. 1: Conceptual model. The direct effect is represented by the path between the QP initiative (predictor) and antibiotic prescribing rate (outcome).
